# Supplementary material
Source: PubMed Central journal article supplement (PMC3527076)
Supplement: NIHMS427859-supplement-supplement_1.pdf [file NIHMS427859-supplement-supplement_1.pdf]

**eTable 1. Clinical and Genetic Features of Discovery Cohort**

| PCGP ID            | Gender | Ethnicity          | Stage      | Age at Diagnosis (Years) | Event-free Survival (Years) | Overall Survival (Years) | Relapse yes/no | Survival Status | <sup>1</sup> ATRX (WGS) | <sup>2</sup> ATRX (IHC) |
|--------------------|--------|--------------------|------------|--------------------------|-----------------------------|--------------------------|----------------|-----------------|-------------------------|-------------------------|
| SJNBL001_D-SK-T205 | Male   | White Non Hispanic | 4          | 7.0                      | 1.0                         | 1.4                      | Yes            | Dead            |                         | Positive                |
| SJNBL002_D-SK-T216 | Female | White Non Hispanic | 4          | 2.3                      | 1.1                         | 2.6                      | Yes            | Alive           | Exon 6-12 deletion      | Mosaic                  |
| SJNBL003_D-SK-T221 | Female | Black Non Hispanic | 4          | 13.0                     | 5.4                         | 5.6                      | Yes            | Alive           | A1690D                  | Mosaic                  |
| SJNBL007_D-SK-T229 | Male   | White Non Hispanic | 4s, then 4 | 0.1                      | 0.8                         | 2.6                      | Yes            | Dead            |                         | n.d.                    |
| SJNBL008_D-SK-T232 | Male   | White Hispanic     | 4          | 3.1                      | 1.5                         | 2.2                      | Yes            | Dead            |                         | Positive                |
| SJNBL009_D-SK-T237 | Male   | Black Non Hispanic | 4          | 3.6                      | 5.9                         | 5.9                      | No             | Alive           | L407F                   | n.d.                    |
| SJNBL010_D-SK-T238 | Male   | White Non Hispanic | 4          | 3.0                      | 6.8                         | 6.8                      | No             | Alive           |                         | Positive                |
| SJNBL011_D-SK-T241 | Male   | White Non Hispanic | 4          | 4.4                      | 1.0                         | 1.7                      | Yes            | Dead            |                         | Positive                |
| SJNBL012_D-SK-T244 | Male   | White Non-Hispanic | 4          | 1.8                      | 7.4                         | 7.4                      | No             | Alive           |                         | Positive                |
| SJNBL013_D-SK-T247 | Female | White Non Hispanic | 4          | 0.7                      | 12.4                        | 12.4                     | No             | Alive           |                         | n.d.                    |
| SJNBL014_D-SK-T256 | Female | Black Non Hispanic | 4          | 5.2                      | 1.4                         | 1.4                      | Yes            | Dead            |                         | Positive                |
| SJNBL015_D-SK-T260 | Male   | White Non Hispanic | 4          | 9.7                      | 3.0                         | 5.2                      | Yes            | Alive           |                         | Mosaic                  |
| SJNBL016_D-SK-T264 | Female | Unknown            | 4          | 3.3                      | 1.5                         | 3.5                      | Yes            | Alive           |                         | Positive                |
| SJNBL017_D-SK-T270 | Male   | White Non Hispanic | 4          | 3.6                      | 2.3                         | 3.5                      | Yes            | Dead            |                         | n.d.                    |
| SJNBL018_D-SK-T278 | Male   | White Non Hispanic | 4          | 4.2                      | 1.2                         | 3.1                      | Yes            | Alive           |                         | n.d.                    |
| SJNBL019_D-SK-T279 | Male   | White Non Hispanic | 4          | 0.7                      | 1.4                         | 3.0                      | Yes            | Alive           |                         | Positive                |
| SJNBL020_D-SK-T280 | Male   | White Non Hispanic | 4          | 0.8                      | 24.1                        | 24.1                     | No             | Alive           |                         | n.d.                    |
| SJNBL021_D-SK-T290 | Female | White Non Hispanic | 4          | 11.8                     | 5.1                         | 5.3                      | No             | Alive           |                         | Positive                |
| SJNBL022_D-SK-T291 | Female | White Non Hispanic | 4          | 4.0                      | 2.1                         | 2.1                      | No             | Dead            |                         | n.d.                    |
| SJNBL023_D-SK-T292 | Male   | White Non Hispanic | 4          | 1.6                      | 6.4                         | 6.4                      | No             | Alive           |                         | Positive                |
| SJNBL024_D-SK-T294 | Male   | White Non Hispanic | 4          | 3.9                      | 4.8                         | 9.9                      | No             | Alive           | Exon 2-10 deletion      | Negative                |
| SJNBL025_D-SK-T296 | Male   | White Non Hispanic | 2B then 4  | 6.5                      | 2.6                         | 7.5                      | Yes            | Dead            | E555*                   | Negative                |
| SJNBL026_D-SK-T301 | Male   | White Non Hispanic | 4          | 0.2                      | 8.0                         | 8.0                      | No             | Alive           |                         | n.d.                    |
| SJNBL027_D-SK-T304 | Male   | Black Non Hispanic | 4          | 1.9                      | 1.8                         | 3.0                      | Yes            | Dead            |                         | Positive                |
| SJNBL029_D-SK-T315 | Male   | White Non Hispanic | 4          | 6.5                      | 1.1                         | 1.7                      | Yes            | Dead            |                         | Schwannian stroma only  |
| SJNBL030_D-SK-T318 | Male   | White Non-Hispanic | 4          | 2.4                      | 0.3                         | 0.3                      | No             | Dead            |                         | Positive                |
| SJNBL031_D-SK-T322 | Male   | Black Non Hispanic | 4          | 29.2                     | 2.6                         | 5.5                      | Yes            | Dead            | R2188Q                  | Negative                |
| SJNBL032_D-SK-T325 | Male   | Black Hispanic     | 4          | 26.9                     | 2.0                         | 2.4                      | Yes            | Alive           | Exon 3-9 deletion       | Negative                |

|                    |        |                                    |   |      |     |     |     |       |                    |          |
|--------------------|--------|------------------------------------|---|------|-----|-----|-----|-------|--------------------|----------|
| SJNBL033_D-SK-T329 | Male   | White Non Hispanic                 | 4 | 3.8  | 0.9 | 1.4 | Yes | Dead  |                    | Positive |
| SJNBL034_D-SK-T332 | Female | White Non-Hispanic                 | 4 | 5.6  | 0.7 | 1.1 | Yes | Dead  |                    | Positive |
| SJNBL035_D-SK-T335 | Male   | White Non Hispanic                 | 4 | 4.6  | 3.2 | 6.8 | Yes | Dead  |                    | Positive |
| SJNBL036_D-SK-T341 | Female | White Non Hispanic                 | 4 | 0.9  | 4.2 | 4.2 | No  | Alive |                    | Positive |
| SJNBL037_D-SK-T342 | Female | White Non Hispanic                 | 4 | 9.0  | 7.8 | 9.5 | Yes | Dead  |                    | n.d.     |
| SJNBL038_D-SK-T343 | Female | White Non Hispanic                 | 4 | 4.1  | 1.7 | 3.3 | Yes | Dead  | Exon 2-10 deletion | n.d.     |
| SJNBL039_D-SK-T350 | Male   | Asian/Far East/Indian Subcontinent | 4 | 25.1 | 1.0 | 3.8 | Yes | Dead  | K425_E426fs        | Negative |
| SJNBL040_D-SK-T351 | Female | White Non Hispanic                 | 4 | 4.2  | 1.3 | 3.0 | Yes | Alive |                    | Positive |
| SJNBL041_D-SK-T354 | Male   | White Non Hispanic                 | 4 | 13.3 | 1.2 | 4.0 | Yes | Dead  | Exon 2-10 deletion | Negative |
| SJNBL042_D-SK-T357 | Female | White Non Hispanic                 | 4 | 3.2  | 1.1 | 2.2 | Yes | Dead  |                    | n.d.     |
| SJNBL044_D-SK-T364 | Female | Black Non Hispanic                 | 4 | 6.1  | 0.7 | 1.7 | Yes | Dead  |                    | n.d.     |
| SJNBL045_D-SK-T369 | Male   | White Non Hispanic                 | 4 | 2.9  | 1.9 | 6.8 | Yes | Alive |                    | Positive |

<sup>1</sup> All ATRX lesions were validated by PCR and Sanger sequencing.

<sup>2</sup> IHC was performed on FFPE sections from the tumors that were used for sequence analysis. Mosaic samples had some nuclear ATRX and some tumor cells lacking ATRX nuclear stain. Positive samples retained nuclear ATRX and negative samples lost ATRX nuclear stain.

<sup>3</sup> Telomere length was estimated for the tumor sample and compared to the matched normal sample. The criteria for longer telomeres was the (Tumor-Germline/Germline) value >0.05. WGS data was validated using telomere qPCR.

<sup>4</sup> FISH results for telomeres were scored as abnormal if they showed evidence of large ultrabright signal characteristic of ALT.

<sup>5</sup> qPCR telomere length was performed on tumor and matched normal whole genome amplified DNA. The criteria for longer telomeres was the (Tumor-Germline/Germline) value >0.05.

<sup>6</sup> The copy numbers for MYCN were estimated from the WGS data. For samples with > 10 copies of MYCN from this analysis, the number of genes in the amplicon is specified as well as the copy number. For samples with ≤ 10 copies of MYCN, we analyzed the size of the amplified region as focal (≤ 5 genes), large segment (> 5 genes) or chromosomal (whole chromosome 2 gain).

<sup>7</sup> MYCN amplification information was extracted from the clinical database and confirmed by pPCR. MYCN copy numbers > 10 was defined as amplified.

<sup>8</sup> Tumor purity by WGS was estimated using CNV, deletion and allelic imbalance in LOH which may be an underestimate if CNV/LOH is subclonal. Purity for SJNBL022 was listed N/A because it does not have any CNV or LOH.

**eTable 1. Clinical and Genetic Features of Discovery Cohort (cont.)**

| PCGP ID            | <sup>3</sup> Telomere (WGS) | <sup>4</sup> Telomere (FISH) | <sup>5</sup> Telomere (qPCR) | MYCN Copy (WGS) <sup>6</sup>                                         | MYCN Amplification (>10 copies by qPCR) <sup>7</sup> | ALK    | 11q               | 1p                  | 17q  | X             | <sup>8</sup> Purity (WGS) | Purity (pathology) |
|--------------------|-----------------------------|------------------------------|------------------------------|----------------------------------------------------------------------|------------------------------------------------------|--------|-------------------|---------------------|------|---------------|---------------------------|--------------------|
| SJNBL001_D-SK-T205 | LONG                        | Abnormal (mosaic)            | LONG                         | Unchanged                                                            | NO                                                   | NO     | Loss              | No change           | Gain |               | 78%                       | 70-90%             |
| SJNBL002_D-SK-T216 | LONG                        | Abnormal (mosaic)            | LONG                         | Unchanged                                                            | NO                                                   | NO     | Loss              | No change           | Gain |               | 81%                       | 65%                |
| SJNBL003_D-SK-T221 | LONG                        | Abnormal (mosaic)            | LONG                         | +1 copy, whole chromosome 2                                          | NO                                                   | NO     | Gain, whole chr11 | No change/Weak gain | Gain | 1 copy loss   | 91%                       | 90%                |
| SJNBL007_D-SK-T229 | LONG                        | n.d.                         | n.d.                         | +1 copy, large segment +150 copies, 2 genes                          | NO                                                   | NO     | No change         | Loss                | Gain |               | 94%                       | 85-90%             |
| SJNBL008_D-SK-T232 | SHORT                       | Normal                       | n.d.                         | +0.5 copy, large segment                                             | Amplified                                            | F1174L | No change         | Loss                | Gain |               | 81%                       | 85%                |
| SJNBL009_D-SK-T237 | SHORT                       | n.d.                         | SHORT                        | +65 copies, 2 genes                                                  | NO                                                   | NO     | Loss              | Loss                | Gain |               | 82%                       | 70-75%             |
| SJNBL010_D-SK-T238 | SHORT                       | Normal                       | n.d.                         | +1 copy, large segment +160 copies, 2 genes                          | Amplified                                            | NO     | No change         | Loss                | Gain |               | 83%                       | 90%                |
| SJNBL011_D-SK-T241 | SHORT                       | Normal                       | n.d.                         | Unchanged                                                            | NO                                                   | NO     | Loss              | Loss                | Gain |               | 82%                       | 60%                |
| SJNBL012_D-SK-T244 | SHORT                       | Normal                       | n.d.                         | +0.5 copy, large segment +3 copy, large segment +290 copies, 2 genes | Amplified                                            | NO     | No change         | Loss                | Gain |               | 96%                       | 85-90%             |
| SJNBL013_D-SK-T247 | LONG                        | n.d.                         | n.d.                         | Unchanged                                                            | NO                                                   | NO     | Loss              | No change           | Gain |               | 89%                       | 95%                |
| SJNBL014_D-SK-T256 | SHORT                       | Normal                       | n.d.                         | +180 copies, 3 genes                                                 | Amplified                                            | NO     | Loss              | No change           | Gain | 0.5 copy loss | 81%                       | 55-60%             |
| SJNBL015_D-SK-T260 | SHORT                       | Normal                       | n.d.                         | Unchanged                                                            | NO                                                   | NO     | No change         | No change           | Gain |               | 91%                       | 85%                |
| SJNBL016_D-SK-T264 | SHORT                       | Normal                       | n.d.                         | +260 copies, 2 genes                                                 | Amplified                                            | NO     | No change         | Loss                | Gain |               | 93%                       | 80%                |
| SJNBL017_D-SK-T270 | LONG                        | n.d.                         | n.d.                         | Unchanged                                                            | NO                                                   | NO     | Loss              | Loss                | Gain | 0.5 copy gain | 95%                       | 65-70%             |
| SJNBL018_D-SK-T278 | SHORT                       | n.d.                         | n.d.                         | Unchanged                                                            | NO                                                   | NO     | Loss              | No change           | Gain |               | 82%                       | 70%                |
| SJNBL019_D-SK-T279 | SHORT                       | Normal                       | n.d.                         | Unchanged                                                            | Amplified                                            | NO     | No change         | Loss                | Gain |               | 97%                       | 85%                |

|                    |       |                   |       |                             |           |        |                   |           |                          |           |                |        |        |
|--------------------|-------|-------------------|-------|-----------------------------|-----------|--------|-------------------|-----------|--------------------------|-----------|----------------|--------|--------|
| SJNBL020_D-SK-T280 | LONG  | n.d.              | n.d.  | +1.5 copy, large segment    | NO        | F1174V | No change         | Loss      | Gain                     |           | 93%            | 90%    |        |
| SJNBL021_D-SK-T290 | LONG  | Normal            | n.d.  | +7 copy, focal              | NO        | NO     | No change         | No change | No change                |           | 65%            | 50%    |        |
| SJNBL022_D-SK-T291 | LONG  | n.d.              | LONG  | Unchanged                   | NO        | NO     | No change         | No change | No change                |           | NA             | 90%    |        |
| SJNBL023_D-SK-T292 | SHORT | Normal            | n.d.  | +50 copies, 2 genes         | Amplified | NO     | Loss              | Loss      | Gain                     |           | 97%            | 80-85% |        |
| SJNBL024_D-SK-T294 | LONG  | Abnormal          | LONG  | +1.5 copy, large segment    | NO        | NO     | Loss              | No change | Gain, whole chromosome 1 | Gain      | 59%            | 50%    |        |
| SJNBL025_D-SK-T296 | LONG  | Abnormal (mosaic) | LONG  | Unchanged                   | NO        | NO     | No change         | No change | Gain, whole chromosome 1 | Gain      | 85%            | 75-80% |        |
| SJNBL026_D-SK-T301 | LONG  | n.d.              | n.d.  | +1 copy, whole chromosome 2 | NO        | NO     | No change         | No change | Gain, whole chromosome 1 | Gain      | 79%            | 85%    |        |
| SJNBL027_D-SK-T304 | SHORT | Normal            | n.d.  | +300 copies, 4 genes        | Amplified | F1174L | No change         | Loss      | Gain                     | No change | 95%            | 60%    |        |
| SJNBL029_D-SK-T315 | LONG  | Normal            | n.d.  | Unchanged                   | NO        | NO     | No change         | No change | No change                |           | 89%            | 70%    |        |
| SJNBL030_D-SK-T318 | SHORT | Normal            | SHORT | +65 copies, 2 genes         | Amplified | F1174L | No change         | Loss      | Gain                     |           | 89%            | 65%    |        |
| SJNBL031_D-SK-T322 | LONG  | Abnormal          | LONG  | +0.5 copy, focal            | NO        | NO     | No change         | No change | Gain                     |           | 80%            | 70-75% |        |
| SJNBL032_D-SK-T325 | LONG  | Abnormal          | LONG  | +1 copy, whole chromosome 2 | NO        | NO     | Loss              | No change | Gain                     |           | 68%            | 65%    |        |
| SJNBL033_D-SK-T329 | SHORT | Normal            | n.d.  | +320 copies, 2 genes        | Amplified | NO     | No change         | Loss      | Gain                     | No change | 96%            | >90%   |        |
| SJNBL034_D-SK-T332 | SHORT | Normal            | n.d.  | Unchanged                   | NO        | NO     | No change         | Loss      | Gain                     |           | 83%            | 75-90% |        |
| SJNBL035_D-SK-T335 | SHORT | Normal            | n.d.  | Unchanged                   | NO        | NO     | Loss              | Loss      | Gain                     |           | 81%            | >95%   |        |
| SJNBL036_D-SK-T341 | LONG  | Normal            | n.d.  | +1.5 copy, focal            | NO        | NO     | Loss              | No change | Gain                     |           | 52%            | 60%    |        |
| SJNBL037_D-SK-T342 | LONG  | n.d.              | n.d.  | +1 copy, whole chromosome 2 | NO        | NO     | Gain, whole chr11 | No change | Gain, whole chromosome 1 | Gain      | 0.35 copy gain | 87%    | 75-80% |
| SJNBL038_D-SK-T343 | LONG  | n.d.              | LONG  | Unchanged                   | NO        | NO     | Loss              | No change | Gain                     |           | 87%            | 85%    |        |

|                    |       |                   |      |                             |           |        |                   |                          |      |               |     |        |
|--------------------|-------|-------------------|------|-----------------------------|-----------|--------|-------------------|--------------------------|------|---------------|-----|--------|
| SJNBL039_D-SK-T350 | LONG  | Abnormal (mosaic) | LONG | +2 copy, focal              | NO        | NO     | Loss              | Gain, whole chromosome 1 | Gain |               | 73% | 65%    |
| SJNBL040_D-SK-T351 | SHORT | Normal            |      | +0.5 copy, large segment    | NO        | NO     | No change         | No change/Weak loss      | Gain | 0.5 copy loss | 47% | 80%    |
| SJNBL041_D-SK-T354 | SHORT | Abnormal          | LONG | Unchanged                   | NO        | NO     | Loss              | Loss                     | Gain |               | 74% | 55-60% |
| SJNBL042_D-SK-T357 | SHORT | n.d.              | n.d. | Unchanged                   | NO        | L1196M | Loss              | No change                | Gain |               | 91% | 90%    |
| SJNBL044_D-SK-T364 | LONG  | n.d.              | LONG | +80 copies, 4 genes         | Amplified | R1275Q | Gain, whole chr11 | No change                | Gain | 0.5 copy loss | 48% | 60%    |
| SJNBL045_D-SK-T369 | SHORT | Normal            | n.d. | +1 copy, whole chromosome 2 | NO        | NO     | Loss              | No change                | Gain |               | 72% | 80%    |

<sup>1</sup> All ATRX lesions were validated by PCR and Sanger sequencing

<sup>2</sup> IHC was performed on FFPE sections from the tumors that were used for sequence analysis. Mosaic samples had some nuclear ATRX and some tumor cells lacking ATRX nuclear stain. Positive samples retained nuclear ATRX and negative samples lost ATRX nuclear stain.

<sup>3</sup> Telomere length was estimated for the tumor sample and compared to the matched normal sample. The criteria for longer telomeres was the (Tumor-Germline/Germline) value >0.05. WGS data was validated using telomere qPCR.

<sup>4</sup> FISH results for telomeres were scored as abnormal if they showed evidence of large ultrabright signal characteristic of ALT.

<sup>5</sup> qPCR telomere length was performed on tumor and matched normal whole genome amplified DNA. The criteria for longer telomeres was the (Tumor-Germline/Germline) value >0.05.

<sup>6</sup> The copy numbers for MYCN were estimated from the WGS data. For samples with > 10 copies of MYCN from this analysis, the number of genes in the amplicon is specified as well as the copy number. For samples with ≤ 10 copies of MYCN, we analyzed the size of the amplified region as focal (≤ 5 genes), large segment (> 5 genes) or chromosomal (whole chromosome 2 gain).

<sup>7</sup> MYCN amplification information was extracted from the clinical database and confirmed by pPCR. MYCN copy numbers > 10 was defined as amplified.

<sup>8</sup> Tumor purity by WGS was estimated using CNV deletion and allelic imbalance in LOH which may be an underestimate if CNV/LOH is subclonal. Purity for SJNBL022 was listed N/A because it does not have any CNV or LOH.

**eTable 2. Clinical and Genetic Features of Validation Cohort**

| Sample #         | Gender        | Ethnicity                 | Stage    | Age at Diagnosis (Years) | Event-Free Survival (Years) | Overall Survival (Years) | Relapse yes/no | Survival Status | ATRX               | ALK           | MYCN Amplification (>10 copies by qPCR) |
|------------------|---------------|---------------------------|----------|--------------------------|-----------------------------|--------------------------|----------------|-----------------|--------------------|---------------|-----------------------------------------|
| D-SK-T204        | Male          | Black/ African American   | 4        | 1.2                      | 3.9                         | 3.9                      | no             | alive           |                    | NO            | NO                                      |
| D-SK-T206        | Male          | Unknown                   | 4        | 21.0                     | 0.5                         | 2.2                      | yes            | Dead            |                    | NO            | NO                                      |
| D-SK-T209        | Male          | White Non Hispanic        | 4        | 0.5                      | 0.2                         | 0.2                      | yes            | Dead            |                    | NO            | YES                                     |
| D-SK-T213        | Female        | White Non Hispanic        | 4        | 14.8                     | 1.9                         | 1.9                      | yes            | Dead            |                    | NO            | NO                                      |
| D-SK-T217        | Female        | White Non Hispanic        | 4        | 17.1                     | 13.8                        | 13.8                     | no             | alive           |                    | NO            | NO                                      |
| D-SK-T220        | Female        | White Non Hispanic        | 4        | 31.7                     | 0.7                         | 1.0                      | yes            | Dead            |                    | NO            | NO                                      |
| D-SK-T222        | Female        | Asian/Far East/India      | 4        | 1.7                      | 7.7                         | 7.7                      | no             | alive           |                    | NO            | YES                                     |
| D-SK-T228        | Female        | Black Non Hispanic        | 4        | 0.4                      | 18.1                        | 18.1                     | no             | alive           |                    | NO            | NO                                      |
| D-SK-T235        | Female        | White Non Hispanic        | 4        | 10.5                     | 0.5                         | 0.9                      | yes            | Dead            |                    | NO            | NO                                      |
| D-SK-T252        | Female        | White Non Hispanic        | 4        | 1.1                      | 1.5                         | 2.0                      | yes            | Dead            |                    | NO            | YES                                     |
| D-SK-T261        | Male          | White Non Hispanic        | 4        | 8.9                      | 13.7                        | 13.7                     | no             | alive           |                    | NO            | YES                                     |
| D-SK-T271        | Female        | Black/ African American   | 4        | 23.6                     | 4.6                         | 9.8                      | yes            | Dead            |                    | NO            | NO                                      |
| D-SK-T276        | Female        | Unknown                   | 4        | 10.8                     | 0.6                         | 0.6                      | yes            | Dead            | Exon 2-10 deletion | NO            | NO                                      |
| D-SK-T277        | Male          | Unknown                   | 4        | 1.4                      | 0.7                         | 0.8                      | yes            | Dead            |                    | NO            | YES                                     |
| D-SK-T289        | Female        | White Non Hispanic        | 4        | 10.1                     | 1.0                         | 2.8                      | yes            | Dead            |                    | NO            | NO                                      |
| D-SK-T297        | Female        | Asian/Far East/India      | 4        | 1.6                      | 10.6                        | 10.6                     | no             | alive           |                    | NO            | NO                                      |
| <b>D-SK-T298</b> | <b>Female</b> | <b>White Non Hispanic</b> | <b>4</b> | <b>24.5</b>              | <b>2.7</b>                  | <b>5.9</b>               | <b>yes</b>     | <b>alive</b>    | <b>Y2083C</b>      | <b>F1174L</b> | <b>NO</b>                               |
| <b>D-SK-T300</b> | <b>Male</b>   | <b>White Hispanic</b>     | <b>4</b> | <b>18.4</b>              | <b>3.2</b>                  | <b>4.5</b>               | <b>yes</b>     | <b>Dead</b>     | <b>Q2183L</b>      | <b>F1245L</b> | <b>NO</b>                               |
| D-SK-T305        | Male          | Black/ African American   | 4        | 13.9                     | 0.9                         | 1.6                      | yes            | Dead            |                    | NO            | NO                                      |
| D-SK-T306        | Male          | White Non Hispanic        | 4        | 1.0                      | 0.6                         | 1.1                      | yes            | Dead            |                    | NO            | YES                                     |
| D-SK-T307        | Female        | White Non Hispanic        | 4        | 7.5                      | 2.6                         | 4.2                      | yes            | Dead            |                    | NO            | NO                                      |
| D-SK-T316        | Female        | White Non Hispanic        | 4        | 0.5                      | 12.7                        | 12.7                     | no             | alive           |                    | NO            | YES                                     |
| D-SK-T319        | Male          | White Non Hispanic        | 4        | 7.4                      | 18.5                        | 18.5                     | no             | alive           |                    | NO            | NO                                      |
| D-SK-T338        | Male          | White Non Hispanic        | 4        | 1.3                      | 1.1                         | 7.6                      | yes            | alive           |                    | NO            | YES                                     |
| D-SK-T344        | Male          | White Non Hispanic        | 4        | 0.3                      | 1.8                         | 10.9                     | yes            | alive           |                    | NO            | YES                                     |
| <b>D-SK-T356</b> | <b>Female</b> | <b>White Non Hispanic</b> | <b>4</b> | <b>10.8</b>              | <b>1.4</b>                  | <b>1.9</b>               | <b>yes</b>     | <b>Dead</b>     | <b>K1701fs</b>     | <b>NO</b>     | <b>NO</b>                               |
| D-SK-T363        | Female        | Unknown                   | 4        | 8.0                      | 1.0                         | 1.0                      | yes            | Dead            |                    | NO            | NO                                      |
| D-SK-T370        | Female        | White Non Hispanic        | 4        | 1.4                      | 5.1                         | 5.1                      | no             | alive           |                    | NO            | YES                                     |
| D-SK-T505        | Female        | White Non Hispanic        | 4        | 14.4                     | 0.6                         | 0.6                      | no             | alive           |                    | R1275Q        | NO                                      |
| D-SK-T508        | Male          | White Non Hispanic        | 4        | 13.8                     | 1.0                         | 3.4                      | yes            | Dead            | Exon 2-10 deletion | NO            | NO                                      |
| D-SK-T509        | Female        | White Non Hispanic        | 4        | 7.0                      | 5.0                         | 7.6                      | yes            | Dead            |                    | NO            | NO                                      |

|                  |               |                           |          |             |            |            |           |              |                    |           |           |
|------------------|---------------|---------------------------|----------|-------------|------------|------------|-----------|--------------|--------------------|-----------|-----------|
| D-SK-T542        | Male          | White Non Hispanic        | 4        | 41.9        | 1.7        | 2.6        | yes       | Dead         |                    | NO        | NO        |
| D-SK-T553        | Male          | White Non Hispanic        | 4        | 20.7        | 0.8        | 4.0        | yes       | alive        | Exon 2-10 deletion | NO        | NO        |
| D-SK-T577        | Male          | White Non Hispanic        | 4        | 18.0        | 4.7        | 8.6        | yes       | Dead         |                    | NO        | NO        |
| D-SK-T583        | Male          | Other                     | 4        | 5.7         | 2.0        | 7.2        | yes       | alive        |                    | NO        | NO        |
| D-SK-T586        | Female        | Unknown                   | 4        | 14.6        | 7.2        | 14.5       | yes       | alive        |                    | NO        | NO        |
| D-SK-T588        | Male          | Unknown                   | 4        | 7.4         | 1.8        | 2.9        | yes       | Dead         |                    | NO        | NO        |
| D-SK-T624        | Female        | White Non Hispanic        | 4        | 31.6        | 1.7        | 3.0        | yes       | Dead         |                    | R1275Q    | NO        |
| D-SK-T626        | Male          | White Non Hispanic        | 4        | 20.5        | 1.4        | 5.2        | yes       | alive        |                    | NO        | NO        |
| D-SK-T639        | Female        | White Non Hispanic        | 4        | 19.5        | 1.7        | 3.9        | yes       | Dead         |                    | NO        | NO        |
| D-SK-T659        | Female        | White Non Hispanic        | 4        | 1.0         | 10.5       | 10.6       | yes       | Dead         |                    | NO        | NO        |
| D-SK-T670        | Male          | Unknown                   | 4        | 12.9        | 1.3        | 1.7        | yes       | Dead         | Exon 2-10 deletion | R1275L    | NO        |
| D-SK-T672        | Female        | White Non Hispanic        | 4        | 7.4         | 1.2        | 7.4        | yes       | alive        |                    | NO        | NO        |
| <b>D-SK-T679</b> | <b>Female</b> | <b>White Non Hispanic</b> | <b>4</b> | <b>11.6</b> | <b>9.5</b> | <b>9.5</b> | <b>no</b> | <b>alive</b> | <b>P2292fs</b>     | <b>NO</b> | <b>NO</b> |
| D-SK-T680        | Female        | White Non Hispanic        | 4        | 10.5        | 0.8        | 1.6        | yes       | Dead         |                    | NO        | NO        |
| D-SK-T683        | Male          | White Non Hispanic        | 4        | 12.7        | 1.0        | 3.9        | yes       | Dead         | Exon 2-10 deletion | NO        | NO        |
| D-SK-T686        | Male          | White Non Hispanic        | 4        | 8.0         | 2.3        | 3.1        | yes       | Dead         |                    | NO        | NO        |
| D-SK-T701        | Female        | Black/ African American   | 4        | 10.8        | 4.5        | 4.5        | yes       | Dead         |                    | NO        | NO        |
| D-SK-T715        | Male          | White Non Hispanic        | 4        | 8.4         | 5.4        | 5.4        | no        | alive        |                    | NO        | NO        |
| D-SK-T727        | Male          | White Non Hispanic        | 4        | 14.6        | 0.7        | 0.7        | no        | alive        |                    | R1275Q    | YES       |
| D-SK-T814        | Male          | White Non Hispanic        | 4        | 6.8         | 4.0        | 11.7       | yes       | alive        |                    | NO        | NO        |
| D-SK-T815        | Male          | White Non Hispanic        | 4        | 7.8         | 0.3        | 0.6        | yes       | Dead         |                    | NO        | YES       |
| D-SK-T820        | Male          | Black/ African American   | 4        | 13.9        | 0.4        | 1.9        | yes       | Dead         |                    | F1174L    | NO        |
| D-SK-T823        | Female        | White Non Hispanic        | 4        | 21.2        | 3.6        | 5.4        | yes       | Dead         | Exon 2-10 deletion | NO        | NO        |
| D-SK-T827        | Female        | White Non Hispanic        | 4        | 18.2        | 11.0       | 14.5       | yes       | Dead         | Exon 2-10 deletion | F1245C    | NO        |
| D-SK-T839        | Female        | White Non Hispanic        | 4        | 13.9        | 0.9        | 1.1        | yes       | Dead         |                    | NO        | NO        |
| D-SK-T846        | Male          | Black/ African American   | 4        | 5.1         | 3.6        | 8.2        | yes       | Dead         | Exon 3-12 deletion | NO        | NO        |
| D-SK-T860        | Female        | Black/ African American   | 4        | 7.1         | 7.2        | 16.3       | yes       | alive        |                    | NO        | NO        |
| D-SK-T866        | Male          | White Non Hispanic        | 4        | 4.6         | 3.1        | 7.7        | yes       | Dead         |                    | NO        | NO        |
| D-SK-T895        | Female        | Black/ African American   | 4        | 8.6         | 1.3        | 3.0        | yes       | alive        |                    | NO        | NO        |
| D-SK-T1098       | Male          | Unknown                   | 4        | 21.0        | 0.0        | 0.0        | yes       | Dead         |                    | NO        | NO        |
| D-SK-T1113       | Male          | White Non Hispanic        | 4        | 1.3         | 0.7        | 2.2        | yes       | alive        |                    | NO        | YES       |
| D-SK-T1114       | Female        | Unknown                   | 3        | 24.5        | 1.9        | 1.9        | no        | alive        | E23_splice variant | NO        | NO        |
| D-SK-T1115       | Male          | White Non Hispanic        | 4        | 28.7        | 1.6        | 6.2        | yes       | alive        |                    | F1174C    | NO        |
